# Supplementary material for: Concanavalin A-assisted extraction-free one-pot RPA-CRISPR/Cas12a assay for rapid detection of HPV16
Source: Research Square preprint supplement (doi:10.21203/rs.3.rs-6278232/v1), 2025-04-18
Supplement: Supplementary file 1 [file 0b2bbb066b959e1ad9791419.docx]

**Supplementary Material**

**Concanavalin-A-assisted extraction-free one-pot RPA–CRISPR/Cas12a assay for rapid detection of HPV16**

You Niea,1, Xiaohui Lib,1, Wen Yangc,1, Sihan Feib, Yingfan Wangd, Yazhuo Lia, Ke Zhanga, Jiarui Kanga, Yang Chenga, Hongwei Wanga,*, Dandan Liua,**

1 **Contributed equally.**

**Corresponding author:**

* Hongwei Wang: Department of Pathology, Fourth Medical Centre of Chinese PLA General Hospital, 51 Fucheng Road, Haidian District, Beijing. E-mail: whw6626@sina.com

** Dandan Liu：Department of Pathology, Fourth Medical Centre of Chinese PLA General Hospital, 51 Fucheng Road, Haidian District, Beijing. E-mail: 920966329@qq.com


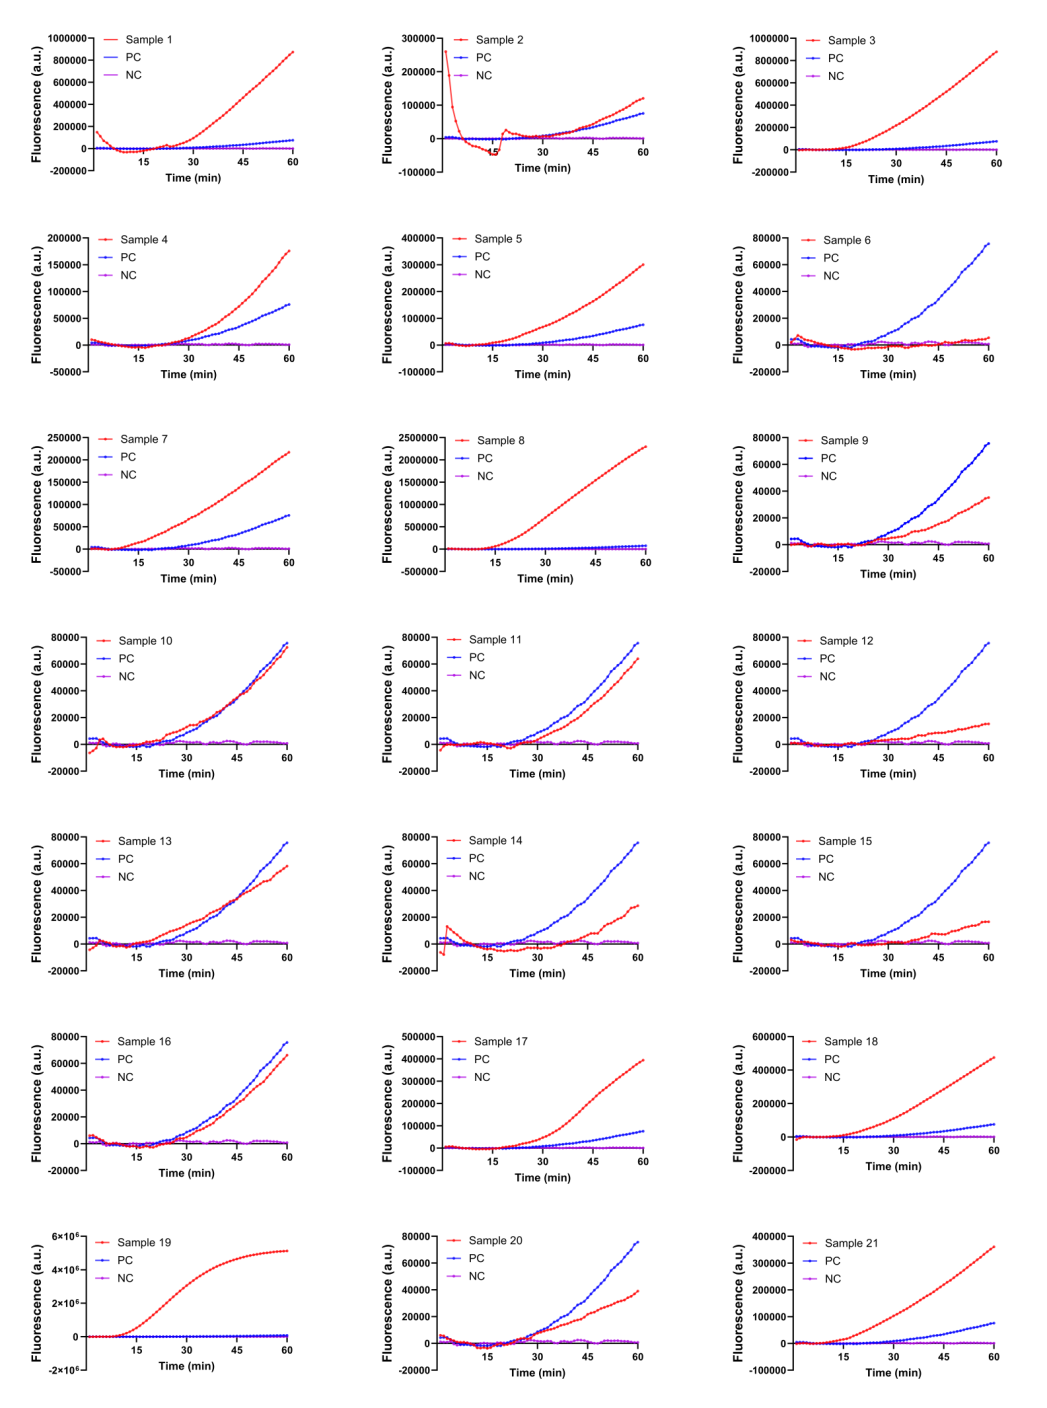


Figure S1. The ConRCA fluorescence assay for HPV16. PC refers to the positive control; NC refers to the negative control.

Table S1. RPA primer sequences

| Name | 5‘—3’ |
| --- | --- |
| RPA F1 | CTGTCCCAGTATCTAAGGTTGTAAGCACGG |
| RPA F2 | GGTTGTAAGCACGGATGAATATGTTGCACG |
| RPA F3 | AGGAACATCCAGACTACTTGCAGTTGGACA |
| RPA R1 | CTAATGGCTGACCACGACCTACCTCAACAC |
| RPA R2 | CCACACCTGCATTTGCTGCATAAGCACTAG |

Table S2. Sequences of sgRNAs from different PAM sites

| Name | 5‘—3’ |
| --- | --- |
| Can-sgRNA F1 | TAATACGACTCACTATAGGGTAATTTCTACTAAGTGTAGATCCTATTAAAAAACCTAACAA |
| Can-sgRNA R1 | TTGTTAGGTTTTTTAATAGGATCTACACTTAGTAGAAATTACCCTATAGTGAGTCGTATTA |
| Can-sgRNA F2 | TAATACGACTCACTATAGGGTAATTTCTACTAAGTGTAGATAGAATACATTTACCTGACCC |
| Can-sgRNA R2 | GGGTCAGGTAAATGTATTCTATCTACACTTAGTAGAAATTACCCTATAGTGAGTCGTATTA |
| Can-sgRNA F3 | TAATACGACTCACTATAGGGTAATTTCTACTAAGTGTAGATGGTTTTCCTGACACCTCATT |
| Can-sgRNA R3 | AATGAGGTGTCAGGAAAACCATCTACACTTAGTAGAAATTACCCTATAGTGAGTCGTATTA |
| Can-sgRNA F4 | TAATACGACTCACTATAGGGTAATTTCTACTAAGTGTAGATATAATCCAGATACACAGCGG |
| Can-sgRNA R4 | CCGCTGTGTATCTGGATTATATCTACACTTAGTAGAAATTACCCTATAGTGAGTCGTATTA |
| Sub-sgRNA F1 | TAATACGACTCACTATAGGGTAATTTCTACTAAGTGTAGATAAAAACCTAACAATAACAAA |
| Sub-sgRNA R1 | TTTGTTATTGTTAGGTTTTTATCTACACTTAGTAGAAATTACCCTATAGTGAGTCGTATTA |
| Sub-sgRNA F2 | TAATACGACTCACTATAGGGTAATTTCTACTAAGTGTAGATGTTCCTAAAGTATCAGGATT |
| Sub-sgRNA R2 | AATCCTGATACTTTAGGAACATCTACACTTAGTAGAAATTACCCTATAGTGAGTCGTATTA |
| Sub-sgRNA F3 | TAATACGACTCACTATAGGGTAATTTCTACTAAGTGTAGATCAATACAGGGTATTTAGAAT |
| Sub-sgRNA R3 | ATTCTAAATACCCTGTATTGATCTACACTTAGTAGAAATTACCCTATAGTGAGTCGTATTA |
| Sub-sgRNA F4 | TAATACGACTCACTATAGGGTAATTTCTACTAAGTGTAGATAGGATGGTGATATGGTTGAT |
| Sub-sgRNA R4 | ATCAACCATATCACCATCCTATCTACACTTAGTAGAAATTACCCTATAGTGAGTCGTATTA |
